# Supplementary material for: TIAM-1/GEF can shape somatosensory dendrites independently of its GEF activity by regulating F-actin localization
Source: eLife. 2019 Jan 29;8:e38949. doi: 10.7554/eLife.38949 (PMC6370339; doi:10.7554/eLife.38949)
Supplement: Figure 1—source data 1. [file elife-38949-fig1-data1.xlsx]

## Sheet: Figrue 1G, H, I
# of branches within 100 μm of the cell body
	Secondaries									Tertiaries									Quaterneries
	Control	dma-1 (tm5159)	dma-1 rescue Line #1	dma-1 rescue Line #2	dma-1 recue Line #3	dma-1ΔICD mCh rescue Line #1	dma-1ΔICD mCh rescue Line #2	dma-1(dz226) [ΔPDZ]		Control	dma-1 (tm5159)	dma-1 rescue Line #1	dma-1 rescue Line #2	dma-1 recue Line #3	dma-1ΔICD mCh rescue Line #1	dma-1ΔICD mCh rescue Line #2	dma-1(dz226) [ΔPDZ]		Control	dma-1 (tm5159)	dma-1 rescue Line #1	dma-1 rescue Line #2	dma-1 recue Line #3	dma-1ΔICD mCh rescue Line #1	dma-1ΔICD mCh rescue Line #2	dma-1(dz226) [ΔPDZ]
	16	13	12	10	11	10	18	9		16	0	16	0	11	8	15	8		30	1	17	0	33	1	1	0
	14	17	12	11	12	12	18	9		14	0	0	11	12	9	1	9		25	0	0	4	32	0	0	0
	13	9	15	17	15	12	17	17		13	2	12	17	15	10	14	14		26	0	22	20	32	0	1	1
	13	9	15	11	11	16	12	14		13	0	15	0	11	0	10	13		24	1	14	0	28	1	2	0
	12	11	12	14	12	10	13	12		12	0	0	14	1	8	10	12		35	0	0	35	1	0	0	4
	11	13	17	15	15	10	14	18		11	0	17	15	15	7	12	17		25	1	32	30	25	2	0	1
	16	18	14	15	11	16	12	6		14	1	14	0	11	14	9	5		28	0	24	0	26	0	0	1
	10	14	11	16	12	12	15	15		10	0	12	16	1	1	13	11		20	1	22	25	2	1	2	0
	15	5	13	12	12	16	12	17		14	0	13	12	12	14	9	11		13	0	32	28	27	0	0	0
	15	14	14	14	13	10	12	18		15	0	14	14	13	7	10	17		26	1	24	28	12	0	1	3
	12	17	10	17	19	10	14	12		12	1	17	17	19	8	11	12		29	0	32	27	22	0	0	8
	9	14	12	18	17	14	14	16		9	0	12	0	0	11	2	14		25	0	23	0	2	1	0	6
	16	10	11	11	15	14	15	18		16	0	18	11	15	12	13	15		22	0	20	35	25	0	0	2
	10	15	11	14	18	12	16	14		10	1	11	14	18	0	14	12		30	1	28	31	15	2	1	4
	17	14	15	14	15	15	14	16		17	0	14	14	15	13	11	16		28	0	28	28	33	0	1	2
	12	15	16	15	19	14	13	16		12	0	16	1	19	12	11	15		20	0	26	0	26	1	0	5
	11	16	14	17	15	10	14	13		10	1	1	17	15	7	1	11		30	0	0	25	18	0	0	6
	10	19	17	12	14	18	15	14		10	1	12	12	0	16	12	12		25	1	28	29	0	1	1	2
	12	11	12	11	14	17	12	18		12	0	17	11	14	1	0	16		27	0	1	24	29	0	0	2
	12	6	10	14	15	17	12	14		11	1	15	14	1	1	10	12		26	0	34	26	1	0	0	6

## Sheet: Figure 2E, F, G, Suppl1 I-Q
# of branches within 100 μm of the cell body
	Secondaries
	Control	tiam-1(tm1556)	kpc-1(gk-8)	hpo-30(ok2047)	lect-2(rz2)	sax-7(nj48)	mnr-1(dz175)	dma-1(tm5159)	tiam-1; lect-2	tiam-1; sax-7	tiam-1; mnr-1	tiam-1; dma-1	tiam-1; kpc-1	tiam-1; hpo-30	dma-1; hpo-30	sax-7; hpo-30	act-4(dz222)	tiam-1; act-4	dma-1; act-4
	8	10	14	8	10	22	17	3	3	2	4	1	6	5	2	6	3	2	2
	7	14	11	12	11	11	12	1	3	2	5	7	5	1	8	15	5	3	0
	7	6	18	10	13	9	18	5	3	2	7	2	1	3	4	3	3	5	1
	11	3	18	10	12	17	23	4	3	1	8	2	13	4	5	4	8	4	2
	8	13	17	7	14	11	20	4	5	8	6	6	2	3	8	11	5	2	0
	9	14	10	13	14	19	15	3	2	3	4	1	7	2	10	9	6	5	1
	6	8	19	13	17	8	11	2	5	0	5	4	4	4	5	5	7	5	2
	9	13	14	9	10	11	15	2	5	2	3	3	2	4	6	8	6	1	1
	8	13	19	11	14	19	13	4	7	2	5	1	4	4	7	9	3	6	1
	6	9	13	9	8	11	14	5	6	3	3	4	7	1	8	14	8	3	3
	9	12	13	11	14	15	24	5	7	0	6	2	10	2	8	7	6	2	0
	7	10	13	8	10	9	17	2	2	1	6	4	2	8	3	10	7	0	5
	8	12	14	8	16	16	13	2	4	1	3	7	4	1	5	16	5	2	3
	8	8	16	11	10	13	15	2	3	1	8	1	9	4	7	11	6	6	2
	6	12	15	13	5	14	12	3	4	1	1	1	0	5	9	9	5	4	2
	10	13	4	8	8	11	11	1	4	0	1	2	2	2	2	8	5	0	2
	9	11	12	8	11	9	14	6	3	7	6	6	6	2	8	13	7	4	1
	9	10	13	16	13	11	14	5	6	3	6	2	7	6	4	5	8	4
	8	12	11	12	12	7	9	4	3	2	7	3	12	7	5	3	8	3
	8	8	14	13	14	12	14	3	4	2	3	1	3	2	0	15	6	3
	Tertiaries
	Control	tiam-1(tm1556)	kpc-1(gk-8)	hpo-30(ok2047)	lect-2(rz2)	sax-7(nj48)	mnr-1(dz175)	dma-1(tm5159)	tiam-1; lect-2	tiam-1; sax-7	tiam-1; mnr-1	tiam-1; dma-1	tiam-1; kpc-1	tiam-1; hpo-30	dma-1; hpo-30	sax-7; hpo-30	act-4(dz222)	tiam-1; act-4	dma-1; act-4
	15	8	3	6	4	6	4	1	0	0	0	0	2	2	0	1	5	2	4
	9	4	2	7	9	11	9	1	0	0	0	0	1	0	0	0	7	0	0
	12	5	9	6	10	3	13	0	1	0	0	1	0	0	1	0	6	2	0
	15	2	5	8	9	6	12	1	0	2	3	0	3	4	0	0	11	0	0
	14	9	3	8	6	7	7	1	1	0	0	1	0	0	0	2	10	0	0
	16	8	3	8	6	7	9	0	0	0	0	0	0	0	0	0	8	0	0
	8	7	7	5	9	2	8	0	2	0	0	3	0	0	0	0	11	0	0
	17	4	2	14	5	6	9	0	0	3	0	0	0	0	1	2	6	0	0
	14	3	7	6	14	8	6	2	2	0	1	0	0	0	4	2	6	0	0
	6	5	1	6	5	7	1	0	2	1	0	3	0	1	0	2	11	1	0
	13	10	1	8	8	5	11	1	4	0	0	2	0	2	0	2	9	0	0
	13	5	6	4	5	6	13	0	0	2	1	0	0	3	0	1	8	0	0
	16	7	9	7	12	7	3	0	2	0	0	1	0	0	0	0	6	0	0
	12	4	5	3	3	1	12	0	0	0	0	0	0	1	0	0	10	0	1
	8	8	5	6	3	5	4	0	0	0	0	0	0	1	0	0	7	2	0
	14	9	4	3	4	5	5	0	0	0	2	0	0	0	0	0	8	0	0
	16	9	2	3	7	4	5	1	2	0	0	0	0	0	0	2	11	0	0
	12	9	1	5	8	3	10	3	0	1	1	1	1	2	0	0	11	1
	12	16	1	5	5	4	4	1	0	1	3	0	2	0	0	1	9	0
	12	7	2	10	9	4	12	0	1	0	1	1	0	0	0	0	8	0
	Quaternaries
	Control	tiam-1(tm1556)	kpc-1(gk-8)	hpo-30(ok2047)	lect-2(rz2)	sax-7(nj48)	mnr-1(dz175)	dma-1(tm5159)	tiam-1; lect-2	tiam-1; sax-7	tiam-1; mnr-1	tiam-1; dma-1	tiam-1; kpc-1	tiam-1; hpo-30	dma-1; hpo-30	sax-7; hpo-30	act-4(dz222)	tiam-1; act-4	dma-1; act-4
	24	0	0	3	10	7	15	0	0	0	0	0	0	0	0	0	2	0	0
	21	1	1	2	6	2	13	0	0	0	0	1	2	0	0	0	0	0	0
	24	0	0	2	0	0	7	0	0	0	0	0	0	0	0	0	3	0	0
	29	1	7	6	4	15	14	0	0	0	0	0	1	1	0	0	8	0	0
	33	0	0	2	0	2	6	1	1	0	0	0	0	0	0	0	2	0	0
	28	0	2	3	6	4	5	0	0	0	0	0	0	0	0	0	3	0	0
	19	1	5	1	10	5	2	0	0	0	0	4	0	0	0	0	5	0	0
	31	0	0	2	5	4	3	0	0	0	0	0	0	0	0	0	3	0	0
	30	0	1	1	4	6	4	0	1	0	0	0	0	0	1	1	8	0	0
	20	0	1	0	1	3	0	0	0	0	0	0	0	0	0	0	8	0	0
	41	0	0	2	4	4	18	0	0	0	0	0	0	0	0	0	0	0	0
	26	0	0	0	1	4	9	0	0	0	0	0	0	0	0	0	2	0	0
	23	3	5	5	4	16	8	0	0	0	0	0	0	0	0	0	7	0	0
	30	0	2	2	3	1	13	0	0	0	0	0	0	0	0	0	2	0	0
	18	1	6	1	1	3	1	0	0	0	0	0	0	0	0	0	0	0	0
	26	1	0	4	3	4	6	0	0	0	0	0	0	0	0	0	7	0	0
	25	0	0	4	1	8	5	0	0	0	0	0	0	0	0	0	8	0	0
	30	0	0	3	2	2	9	0	0	0	0	0	0	1	0	0	3	0
	28	1	0	1	2	6	5	0	0	0	0	0	0	0	0	0	3	0
	25	4	2	1	2	4	2	0	0	0	0	0	0	0	0	0	2	0
Aggregate length of branches within 100 μm of the cell body
	Secondaries
	Control	tiam-1(tm1556)	kpc-1(gk-8)	hpo-30(ok2047)	rab-10(ok1494)	lect-2(rz2)	sax-7(nj48)	mnr-1(dz175)	dma-1(tm5159)	tiam-1; lect-2	tiam-1; sax-7	tiam-1; mnr-1	tiam-1dma-1	tiam-1kpc-1	tiam-1rab-10	tiam-1; hpo-30	dma-1; hpo-30	sax-7; hpo-30	act-4(dz222)	tiam-1; act-4	dma-1; act-4
	112.63	90.28	97.26	119.81	54.78	97.96	224.4	177.6	28.9	28.86	30.28	94.96	8.45	43.22	5.92	50.29	19.91	106.78	40.48	16.53	14.297
	71.64	138.89	44.18	217.16	49.96	147.75	123.93	130.2	13.13	18.24	23.66	51.43	59.69	42.83	6.41	6.22	84.31	137.52	49.55	27.36	0
	90.3	62.43	117.39	133.02	19.9	158.26	113.1	214.48	16.92	60.68	31.11	86.22	23.95	4.51	6.47	23.55	30.74	20.88	22.38	43.64	5.898
	195.01	34.51	114.5	175.05	11.25	171.17	214.32	287.04	51.47	45.88	8.29	88.66	10.96	72.71	19.97	54.43	44.51	39.81	105.34	20.17	10.1
	115.73	163.94	104.91	86.69	52.44	188.86	93.69	317.22	44.77	61.51	62.69	35.02	72.26	8.42	31.57	17.67	75.05	109.68	59.23	29.88	0
	141.42	118.42	68.09	187.28	66.42	184.24	139.21	173.63	18.72	11.26	25.54	56.27	7.02	49.58	29	68.51	87.43	109.51	68.57	47.96	4.776
	107.27	105.61	106.8	147.51	28.19	218.8	101.8	219.9	23.69	61.63	0	41.22	104.27	39.96	24.95	32.33	44.45	55.28	92.91	37.02	8.114
	115.24	87.66	99.53	150.01	32.59	98.93	115.77	214.71	24.95	46.16	22.7	21.95	34.2	15.81	21.43	24.1	66.02	106.01	97.27	25.5	13.171
	129.59	71.92	121.64	152.06	37.19	174.77	139.91	159.14	50.39	62.55	14.3	46.55	18.18	24.28	22.46	36.26	70.48	112	32.99	38.25	2.578
	60.73	79.76	101.3	118.09	33.29	115.97	109.19	245.99	43.12	57.93	47.22	19.52	46.72	45.57	35.02	10.63	65.44	107.45	104.96	24.38	26.34
	115.65	135.88	76.5	136.38	21.08	147.73	126.08	204.59	43.34	58.87	0	51.38	21.09	72.07	26.68	14.72	73.7	82.88	100.46	18.57	0
	102.51	110.07	96.85	106.7	45.74	119.88	119.94	235.1	19.11	12.76	13.21	63.42	27.66	10.02	48.79	56.7	25.06	129.45	102.78	0	39.158
	115.5	148.24	52.05	120.24	30.77	193.29	160.1	142.86	17.36	53.15	8.49	35.19	76.43	106.2	27.98	11.07	59.63	152.38	66.9	16.58	20.04
	136.77	64.68	81.71	120.24	31.21	125.11	135.74	144.61	36.18	55.67	8.47	128.98	6.77	65.56	24.26	37.47	103.94	131.38	110.38	35.37	18.012
	74.29	152.62	108.54	149.69	15.27	50.38	185.1	217.52	22.28	29.37	8.34	7.01	10	0	56.45	49.24	61.71	81.19	53.2	41.06	17.911
	156.22	165.4	41.32	97.88	46.92	105.5	94.04	173.75	4.87	51.32	0	12.78	20.99	10.84	45.55	18.17	11.72	89.35	71.35	0	14.791
	135.75	128.72	97.34	133.71	54.91	163.72	76.79	178.59	44.87	44.63	50.53	80.85	47.59	31.89	59.29	16.45	81.68	148.55	122.83	25.54	15.151
	100.4	112.78	98.89	159.38	45.47	142.53	126.81	138.98	79.01	100.69	57.88	46.26	19.02	54.24	28.29	54.97	43.46	103.06	92.38	33.76
	120.39	148.12	46.28	188.7	53.25	152.23	55.89	76.18	40.43	35.12	13.73	67.99	67.87	85.33	41.56	64.84	43.15	26.05	92.96	23.38
	128.69	112.06	81.33	188.78	41.49	180.32	107.51	210.51	36.48	36.47	26.71	35.29	12.89	19.14	55.43	15.41	0	155.03	60.11	17.5
	Tertiaries
	Control	tiam-1(tm1556)	kpc-1(gk-8)	hpo-30(ok2047)	rab-10(ok1494)	lect-2(rz2)	sax-7(nj48)	mnr-1(dz175)	dma-1(tm5159)	tiam-1; lect-2	tiam-1; sax-7	tiam-1; mnr-1	tiam-1dma-1	tiam-1kpc-1	tiam-1rab-10	tiam-1; hpo-30	dma-1; hpo-30	sax-7; hpo-30	act-4(dz222)	tiam-1; act-4	dma-1; act-4
	164.46	67.34	16.6	113.57	14.21	53.68	87.44	76.07	27.13	0	0	0	0	14.05	0	29.23	0	8.37	44.8	9.86	37.288
	86.86	56.14	11.25	63.55	0	52.17	56.87	78.03	3.8	0	0	0	0	7.74	0	0	0	0	94.21	0	0
	163.26	40.37	55.18	85.59	0	73.82	12.7	126.88	0	21.71	0	0	5.79	0	0	0	4.23	0	69.84	5.41	0
	160	26.94	41.2	106.79	0	94.31	57.36	106.58	19.78	0	16.56	24.63	0	76.09	11.04	86.18	0	0	107.34	0	0
	170.41	46.72	8.82	137.89	15.24	44.89	83.59	90.15	25.84	5.94	0	0	8.89	0	0	0	0	8.38	129.88	0	0
	174.47	35.57	15.57	42.8	0	68.7	65.45	70.23	0	0	0	0	0	0	0	0	0	0	135.98	0	0
	166.5	70.36	56.54	102.42	0	79.46	43.41	193.76	0	35.69	0	0	127.84	0	0	0	0	0	109.3	0	0
	195.65	46.92	10.11	175.12	10.01	68.99	66.16	81.89	0	0	22.28	0	0	0	0	0	38.8	32.23	78.89	0	0
	158.46	28.22	24.11	43.75	0	137.77	85.75	45.37	43.36	37.47	0	11.79	0	0	0	0	124.58	38.41	127.53	0	0
	129.76	20.06	8.9	43.3	0	55.56	98.98	8.96	0	10.83	9.05	0	78.3	0	0	8.66	0	22.98	135.03	4.55	0
	265.75	89.04	6.44	117.48	0	72.45	30.36	105.78	4.92	76.47	0	0	28.24	0	0	11.43	0	13.43	118.93	0	0
	162.99	28.68	29.64	63.21	0	52.24	34.24	168.03	0	0	20.31	13.32	0	0	2.39	15.22	0	3.19	77.38	0	0
	148.89	74.03	67.95	143.36	0	134.78	90.33	51.65	0	22.09	0	0	9.05	0	0	0	0	0	88.64	0	0
	174.36	14.68	13.42	46.01	0	11.99	13.25	145.39	0	0	0	0	0	0	0	22.57	0	0	145.6	0	1.928
	136.81	105.4	38.29	88.57	0	67.99	82.64	43.08	0	0	0	0	0	0	0	18.82	0	0	87.29	14.45	0
	145.64	167.15	55.98	37.23	0	17.79	36.71	62	0	0	0	45.96	0	0	10.27	0	0	0	159.06	0	0
	128.19	90.78	22.24	77.89	0	85.01	48.28	34.17	25.83	30.88	0	0	0	0	0	0	0	12.95	138.53	0	0
	148.8	49.4	20.46	87.74	7.19	170.58	19.64	84.08	31.58	0	19.97	17.4	18.15	27.45	0	23.5	0	0	177.06	8.22
	146.96	139.12	11.55	74.56	7.57	44.88	65.02	84.11	3.83	0	13	42.3	0	24.43	0	0	0	10.16	97.11	0
	177.59	77.36	12.46	89.34	12.52	56.17	58.06	204.37	0	52.57	0	10.74	10.93	0	0	0	0	0	119.15	0
	Quaternaries
	Control	tiam-1(tm1556)	kpc-1(gk-8)	hpo-30(ok2047)	rab-10(ok1494)	lect-2(rz2)	sax-7(nj48)	mnr-1(dz175)	dma-1(tm5159)	tiam-1; lect-2	tiam-1; sax-7	tiam-1; mnr-1	tiam-1dma-1	tiam-1kpc-1	tiam-1rab-10	tiam-1; hpo-30	dma-1; hpo-30	sax-7; hpo-30	act-4(dz222)	tiam-1; act-4	dma-1; act-4
	287.23	0	0	31.03	0	83.84	33.1	115.2	0	0	0	0	0	0	0	0	0	0	6.41	0	0
	249.22	10.93	3.91	11.06	0	42.15	11.05	98.09	0	0	0	0	1.14	13.14	0	0	0	0	0	0	0
	260.45	0	0	19.11	0	0	0	63.49	0	0	0	0	0	0	0	0	0	0	5.9	0	0
	329.48	3.34	29.68	33.61	0	14.96	105.64	90.65	0	0	0	0	0	10.72	0	4.44	0	0	34.79	0	0
	363.39	0	0	7.34	0	0	6.6	60.18	5.66	2.29	0	0	0	0	0	0	0	0	11.39	0	0
	373.82	0	4.93	26.55	0	48.94	11.97	41.33	0	0	0	0	0	0	0	0	0	0	14.67	0	0
	262.3	6.82	11.47	15.39	0	60.83	44.24	10.28	0	0	0	0	41.03	0	0	0	0	0	13.17	0	0
	298.66	0	0	17.12	0	41.81	25.48	53.21	0	0	0	0	0	0	0	0	0	0	15.34	0	0
	376.73	0	4.55	16.18	0	49.75	28.15	17.02	0	1.63	0	0	0	0	0	0	9.69	5.38	27.63	0	0
	249.42	0	2.26	0	0	2.6	10.72	0	0	0	0	0	0	0	0	0	0	0	34.26	0	0
	377.63	0	0	21.13	0	13.78	17.71	153.91	0	0	0	0	0	0	0	0	0	0	0	0	0
	292.38	0	0	0	0	0.81	16.25	75.59	0	0	0	0	0	0	0	0	0	0	5.51	0	0
	259.88	13.83	18.49	37.21	0	55.61	76.99	85.29	0	0	0	0	0	0	0	0	0	0	34.77	0	0
	309.09	0	2.54	14.49	0	26.69	6.41	86.94	0	0	0	0	0	0	0	0	0	0	9.24	0	0
	234.14	8.13	23.88	4.58	0	15.6	8.19	3.98	0	0	0	0	0	0	0	0	0	0	0	0	0
	297.04	1.7	0	20.64	0	28.54	33.83	36.04	0	0	0	0	0	0	0	0	0	0	43.48	0	0
	267.5	0	0	52.19	0	9.08	44.96	29.11	0	0	0	0	0	0	0	0	0	0	43.34	0	0
	336.6	0	0	18.14	0	3.09	16.8	75.64	0	0	0	0	0	0	0	3.9	0	0	16.49	0
	325.94	9.15	0	9.91	0	9.1	44.31	29.66	0	0	0	0	0	0	0	0	0	0	17.42	0
	297.36	15.93	4.06	11.14	0	18.06	25.11	15.38	0	0	0	0	0	0	0	0	0	0	13.43	0
Average length of branches within 100 μm of the cell body
	Secondaries
	Control	tiam-1(tm1556)	kpc-1(gk-8)	hpo-30(ok2047)	rab-10(ok1494)	lect-2(rz2)	sax-7(nj48)	mnr-1(dz175)	dma-1(tm5159)	tiam-1; lect-2	tiam-1; sax-7	tiam-1; mnr-1	tiam-1dma-1	tiam-1kpc-1	tiam-1rab-10	tiam-1; hpo-30	dma-1; hpo-30	sax-7; hpo-30	act-4(dz222)	tiam-1; act-4	dma-1; act-4
	14.08	9.03	6.95	14.98	10.96	9.8	10.2	10.45	9.63	9.62	15.14	23.74	8.45	7.2	5.92	10.06	9.96	17.8	13.49	8.26	7.1485
	10.23	9.92	4.02	18.1	12.49	13.43	11.27	10.85	13.13	6.08	11.83	10.29	8.53	8.57	6.41	6.22	10.54	9.17	9.91	9.12
	12.9	10.4	6.52	13.3	9.95	12.17	12.57	11.92	3.38	20.23	15.56	12.32	11.97	4.51	6.47	7.85	7.68	6.96	7.46	8.73	5.898
	17.73	11.5	6.36	17.5	5.62	14.26	12.61	12.48	12.87	15.29	8.29	11.08	5.48	5.59	6.66	13.61	8.9	9.95	13.17	5.04	5.05
	14.47	12.61	6.17	12.38	13.11	13.49	8.52	15.86	11.19	12.3	7.84	5.84	12.04	4.21	7.89	5.89	9.38	9.97	11.85	14.94
	15.71	8.46	6.81	14.41	9.49	13.16	7.33	11.58	6.24	5.63	8.51	14.07	7.02	7.08	7.25	34.26	8.74	12.17	11.43	9.59	4.776
	17.88	13.2	5.62	11.35	9.4	12.87	12.73	19.99	11.84	12.33		8.24	26.07	9.99	6.24	8.08	8.89	11.06	13.27	7.4	4.057
	12.8	6.74	7.11	16.67	8.15	9.89	10.52	14.31	12.48	9.23	11.35	7.32	11.4	7.9	7.14	6.03	11	13.25	16.21	25.5	13.171
	16.2	5.53	6.4	13.82	9.3	12.48	7.36	12.24	12.6	8.94	7.15	9.31	18.18	6.07	7.49	9.07	10.07	12.44	11	6.38	2.578
	10.12	8.86	7.79	13.12	8.32	14.5	9.93	17.57	8.62	9.66	15.74	6.51	11.68	6.51	7	10.63	8.18	7.68	13.12	8.13	8.78
	12.85	11.32	5.88	12.4	5.27	10.55	8.41	8.52	8.67	8.41		8.56	10.55	7.21	8.89	7.36	9.21	11.84	16.74	9.29
	14.64	11.01	7.45	13.34	9.15	11.99	13.33	13.83	9.55	6.38	13.21	10.57	6.91	5.01	4.88	7.09	8.35	12.95	14.68		7.8316
	14.44	12.35	3.72	15.03	7.69	12.08	10.01	10.99	8.68	13.29	8.49	11.73	10.92	26.55	6.99	11.07	11.93	9.52	13.38	8.29	6.68
	17.1	8.08	5.11	10.93	10.4	12.51	10.44	9.64	18.09	18.56	8.47	16.12	6.77	7.28	8.09	9.37	14.85	11.94	18.4	5.9	9.006
	12.38	12.72	7.24	11.51	5.09	10.08	13.22	18.13	7.43	7.34	8.34	7.01	10		9.41	9.85	6.86	9.02	10.64	10.26	8.9555
	15.62	12.72	10.33	12.23	11.73	13.19	8.55	15.8	4.87	12.83		12.78	10.49	5.42	7.59	9.09	5.86	11.17	14.27		7.3955
	15.08	11.7	8.11	16.71	13.73	14.88	8.53	12.76	7.48	14.88	7.22	13.48	7.93	5.31	7.41	8.22	10.21	11.43	17.55	6.38	15.151
	11.16	11.28	7.61	9.96	9.09	10.96	11.53	9.93	15.8	16.78	19.29	7.71	9.51	7.75	5.66	9.16	10.86	20.61	11.55	8.44
	15.05	12.34	4.21	15.72	8.88	12.69	7.98	8.46	10.11	11.71	6.87	9.71	22.62	7.11	5.94	9.26	8.63	8.68	11.62	7.79
	16.09	14.01	5.81	14.52	10.37	12.88	8.96	15.04	12.16	9.12	13.36	11.76	12.89	6.38	9.24	7.71		10.34	10.02	5.83
	Tertiaries
	Control	tiam-1(tm1556)	kpc-1(gk-8)	hpo-30(ok2047)	rab-10(ok1494)	lect-2(rz2)	sax-7(nj48)	mnr-1(dz175)	dma-1(tm5159)	tiam-1; lect-2	tiam-1; sax-7	tiam-1; mnr-1	tiam-1dma-1	tiam-1kpc-1	tiam-1rab-10	tiam-1; hpo-30	dma-1; hpo-30	sax-7; hpo-30	act-4(dz222)	tiam-1; act-4	dma-1; act-4
	10.96	8.42	5.53	18.93	7.11	13.42	14.57	19.02	27.13					7.03		14.61		8.37	8.96	4.93	9.322
	9.65	14.03	5.62	9.08		5.8	5.17	8.67	3.8					7.74					13.46
	13.6	8.07	6.13	14.27		7.38	4.23	9.76		21.71			5.79				4.23		11.64	2.71
	10.67	13.47	8.24	13.35		10.48	9.56	8.88	19.78		8.28	8.21		25.36	11.04	21.55			9.76
	12.17	5.19	2.94	17.24	7.62	7.48	11.94	12.88	25.84	5.94			8.89					4.19	12.99
	10.9	4.45	5.19	5.35		11.45	9.35	7.8											17
	20.81	10.05	8.08	20.48		8.83	21.7	24.22		17.84			42.61						9.94
	11.51	11.73	5.05	12.51	5.01	13.8	11.03	9.1			7.43						38.8	16.12	13.15
	11.32	9.41	3.44	7.29		9.84	10.72	7.56	21.68	18.74		11.79					31.15	19.2	21.26
	21.63	4.01	8.9	7.22		11.11	14.14	8.96		5.41	9.05		26.1			8.66		11.49	12.28	4.55
	20.44	8.9	6.44	14.68		9.06	6.07	9.62	4.92	19.12			14.12			5.71		6.71	13.21
	12.54	5.74	4.94	15.8		10.45	5.71	12.93			10.16	13.32			2.39	5.07		3.19	9.67
	9.31	10.58	7.55	20.48		11.23	12.9	17.22		11.04			9.05						14.77
	14.53	3.67	2.68	15.34		4	13.25	12.12								22.57			14.56		1.928
	17.1	13.18	7.66	14.76		22.66	16.53	10.77								18.82			12.47	7.22
	10.4	18.57	14	12.41		4.45	7.34	12.4				22.98			10.27				19.88
	8.01	10.09	11.12	25.96		12.14	12.07	6.83	25.83	15.44								6.47	12.59
	12.4	5.49	20.46	17.55	7.19	21.32	6.55	8.41	10.53		19.97	17.4	18.15	27.45		11.75			16.1	8.22
	12.25	8.7	11.55	14.91	7.57	8.98	16.25	21.03	3.83		13	14.1		12.22				10.16	10.79
	14.8	11.05	6.23	8.93	6.26	6.24	14.51			52.57		10.74	10.93						14.89
	Quaternaries
	Control	tiam-1(tm1556)	kpc-1(gk-8)	hpo-30(ok2047)	rab-10(ok1494)	lect-2(rz2)	sax-7(nj48)	mnr-1(dz175)	dma-1(tm5159)	tiam-1; lect-2	tiam-1; sax-7	tiam-1; mnr-1	tiam-1dma-1	tiam-1kpc-1	tiam-1rab-10	tiam-1; hpo-30	dma-1; hpo-30	sax-7; hpo-30	act-4(dz222)	tiam-1; act-4	dma-1; act-4
	11.97			10.34		8.38	4.73	7.68											3.21
	11.87	10.93	3.91	5.53		7.03	5.53	7.55					1.14	6.57
	10.85			9.56				9.07											1.97	0	0
	11.36	3.34	4.24	5.6		3.74	7.04	6.47						10.72		4.44			4.35
	11.01			3.67			3.3	10.03	5.66	2.29									5.69
	13.35		2.46	8.85		8.16	2.99	8.27											4.89
	13.81	6.82	2.29	15.39		6.08	8.85	5.14					10.26						2.63
	9.63			8.56		8.36	6.37	17.74											5.11
	12.56		4.55	16.18		12.44	4.69	4.26		1.63							9.69	5.38	3.45
	12.47		2.26			2.6	3.57												4.28
	9.21			10.57		3.45	4.43	8.55
	11.25					0.81	4.06	8.4											2.76
	11.3	4.61	3.7	7.44		13.9	4.81	10.66											4.97
	10.3		1.27	7.25		8.9	6.41	6.69											4.62
	13.01	8.13	3.98	4.58		15.6	2.73	3.98
	11.42	1.7		5.16		9.51	8.46	6.01											6.21
	10.7			13.05		9.08	5.62	5.82											5.42
	11.22			6.05		1.54	8.4	8.4								3.9			5.5
	11.64	9.15		9.91		4.55	7.38	5.93											5.81
	11.89	3.98	2.03	11.14		9.03	6.28	7.69											6.72

## Sheet: Figure 3H, I, J
# of branches within 100 μm of the cell body
	Secondaries
	WT	tiam-1(o/e)	tiam-1(tm1556)	act-4(dz222)	tiam-1(o/e); act-4
	8	10	10	3	5
	7	15	14	5	7
	7	14	6	3	10
	11	19	3	8	8
	8	14	13	5	9
	9	13	14	6	6
	6	18	8	7	9
	9	14	13	6	9
	8	17	13	3	6
	6	17	9	8	11
	9	11	12	6	7
	7	17	10	7	6
	8	14	12	5	5
	8	17	8	6	6
	6	14	12	5	8
	10	16	13	5	8
	9	15	11	7	9
	9	13	10	8	7
	8	14	12	8	7
	8	14	8	6	10
	Tertiaries
	WT	tiam-1(o/e)	tiam-1(tm1556)	act-4(dz222)	tiam-1(o/e); act-4
	15	18	8	5	5
	9	24	4	7	6
	12	16	5	6	5
	15	22	2	11	8
	14	18	9	10	6
	16	21	8	8	10
	8	20	7	11	11
	17	19	4	6	10
	14	22	3	6	6
	6	21	5	11	6
	13	12	10	9	6
	13	23	5	8	6
	16	21	7	6	9
	12	17	4	10	7
	8	18	8	7	13
	14	16	9	8	9
	16	17	9	11	9
	12	18	9	11	10
	12	22	16	9	8
	12	16	7	8	8
	Quaternaries
	WT	tiam-1(o/e)	tiam-1(tm1556)	act-4(dz222)	tiam-1(o/e); act-4
	24	29	0	2	0
	21	47	1	0	0
	24	44	0	3	2
	29	43	1	8	1
	33	44	0	2	3
	28	29	0	3	8
	19	49	1	5	1
	31	38	0	3	3
	30	44	0	8	7
	20	37	0	8	1
	41	35	0	0	1
	26	38	0	2	1
	23	56	3	7	4
	30	40	0	2	0
	18	44	1	0	6
	26	41	1	7	2
	25	36	0	8	2
	30	35	0	3	0
	28	47	1	3	4
	25	32	4	2	2

## Sheet: Figure 3M
# of end branches within 100 μm of the cell body
	dma-1(tm5159)	dma-1(tm5159); tiam-1(o/e)
	3	20
	1	21
	5	18
	4	20
	6	30
	4	21
	4	20
	2	17
	4	21
	5	29
	6	27
	2	22
	2	25
	3	31
	3	21
	1	29
	6	33
	7	24
	4	33
	2	23

## Sheet: Figure 4I
Average Fluorescence of DMA-1::GFP on primary dendrite
	Control	hpo-30 overexpression
	301.607	60.9492
	84.4977	10.945
	186.807	47.2462
	87.2048	19.779
	136.589	14.1537
	160.162	10.1872
	252.693	30.1975
	145.649	10.7077
	225.399	26.5588
	176.338	11.822
		15.5715
		43.8852
		26.9438

## Sheet: Figure 4K, L
Average diffuse fluorescence of DMA-1::GFP within 100 μm of cell body
	Wildtype		Hpo-30
	Tertiary	Primary	Teritary	Primary
	5.33625	10.014	40.6638	19.2653
	3.99225	9.72825	16.9725	15.16
	8.7485	10.014	44.1725
	7.83	34.0003	32.985	24.9348
	10.0107	24.0678	42.5965	28.4078
	20.6227	45.1835	27.5825	26.1947
	11.5422	34.3558	16.9405	10.3033

## Sheet: Figure 4M, N, O Figure 2 Suppl.
# of DMA-1::GFP puncta 30 to 130 μm from cell body
	Tertiary					Primary					Primary/Tertiary
	control	tiam-1(tm1556)	act-4(dz222)	hpo-30(ok2047)		control	tiam-1(tm1556)	act-4(dz222)	hpo-30(ok2047)		control	tiam-1(tm1556)	act-4(dz222)	hpo-30(ok2047)
	5	6	5	1		10	6	5	7		2	1	1	7
	4	3	4	1		8	10	5	5		2	3.33333	1.25	5
	3	8	12	2		8	14	4	5		2.66667	1.75	0.333333	2.5
	6	4	7	2		10	8	4	5		1.66667	2	0.571429	2.5
	4	3	6	2		11	8	2	6		2.75	2.66667	0.333333	3
	4	5	6	1		11	7	5	6		2.75	1.4	0.833333	6
	2	5	11	3		12	7	6	6		6	1.4	0.545455	2
	4	2	6	2		10	8	6	8		2.5	4	1	4
	10	6	10	3		12	8	5	10		1.2	1.33333	0.5	3.33333
	4	8	10	2		13	6	7	7		3.25	0.75	0.7	3.5
	9	2	7	2		16	7	5	5		1.77778	3.5	0.714286	2.5
	3	8		3		11	5		4		3.66667	0.625		1.33333
	4					10					2.5
	2					10					5

## Sheet: Figure 4R
Wildtype background					hpo-30 background
Image name	Total puncta # in 1st frame	Immobile puncta #	mobile puncta #		Image name	Total puncta # in 1st frame	Immobile puncta #	mobile puncta #
dma-1 GFP 20180920 WT 004	44	7	37		20181003 hpo-30 1003 002	21	10	11
dma-1 GFP 20180920 WT 003	46.2	6	40.2		20181003 hpo-30 1003 004	31	7	24
dma-1 GFP 20180920 WT 002	43.2667	4	39.2667		20181003 hpo-30 1003 005	30	7	23
dma-1 GFP 20180920 WT 001	47.6667	9	38.6667		20180927 hpo-30 1003 001	32	7	25
20180913 WT 003	41.0667	12	29.0667		20180927 hpo-30 1003 002	48	10	38
20180913 WT 002	39.6	11	28.6		20180927 hpo-30 1003 003	36	6	30
20180809 WT 002	52.0667	9	43.0667
20180809 WT 001	44	10	34

## Sheet: Figure 5C, D, E
# of branches within 100 μm of the cell body
	Secondaries							Tertiary							Quaternaries
	Control	tiam-1(tm1556)	Full Length TIAM-1 rescue Line #1	Full Length TIAM-1 rescue Line #2	GEF-only TIAM-1 rescue Line #1	GEF-only TIAM-1 rescue Line #2		Control	tiam-1(tm1556)	Full Length TIAM-1 rescue Line #1	Full Length TIAM-1 rescue Line #2	GEF-only TIAM-1 rescue Line #1	GEF-only TIAM-1 rescue Line #2		Control	tiam-1(tm1556)	Full Length TIAM-1 rescue Line #1	Full Length TIAM-1 rescue Line #2	GEF-only TIAM-1 rescue Line #1	GEF-only TIAM-1 rescue Line #2
	14	10	12	17	11	13		16	8	18	15	17	18		31	0	59	65	13	8
	13	14	11	10	14	18		20	4	17	15	17	21		29	1	54	61	15	10
	13	6	12	11	9	15		19	5	18	17	14	15		31	0	50	57	15	16
	11	3	8	16	8	15		13	2	11	18	12	18		18	1	44	45	13	22
	16	13	11	8	17	14		20	9	17	12	24	18		29	0	47	38	6	18
	10	14	10	13	16	12		19	8	15	20	18	17		36	0	44	68	7	12
	14	8	9	8	10	14		20	7	14	12	6	20		21	1	50	48	2	6
	12	13	12	14	9	9		21	4	18	18	14	12		33	0	43	68	16	12
	16	13	14	16	5	11		22	3	21	14	8	15		32	0	62	43	0	17
	16	9	11	17	16	12		26	5	17	20	20	18		35	0	58	63	11	14
	16	12						16	10						22	0
	10	10						15	5						27	0
	17	12						20	7						28	3
	17	8						21	4						30	0
	11	12						16	8						20	1
	14	13						14	9						24	1
	19	11						23	9						31	0
	10	10						16	9						35	0
	18	12						26	16						31	1
	14	8						20	7						35	4

## Sheet: Figure 6C
% of end branches wihtin 100 μm with UtrCH enrichment
	Control	tiam-1(tm1556)
	100	100
	97.6744	91.6667
	96.1538	69.2308
	100	79.1667
	96.9697	82.6087
	100	84.6154
	100	76.9231
	100	70
	100	93.75
	100	58.8235
		83.3333
		100
		89.4737
